# Supplementary material for: Identification of RRM2 as a Potential Biomarker for the Diagnosis and Prognosis of Rheumatoid Arthritis
Source: Research Square preprint supplement (doi:10.21203/rs.3.rs-449273/v1), 2021-04-27
Supplement: Supplementary file 1 [file 05dfe30a639c81162f4b2b79.docx]

**Supplementary Table S5. ROC curve validates the diagnostic value of differentially expressed genes from patients with RA.**

| Variables | AUC | P value | 95%CI | Sensitivity | Specificity | Cutoff value |
| --- | --- | --- | --- | --- | --- | --- |
| ASPM | 0.654 | 0.019 | 0.540-0.756 | 0.571 | 0.821 | 0.001906858 |
| DTL | 0.995 | <0.001 | 0.949-1.000 | 1.000 | 0.975 | 0.000000004 |
| RRM2 | 0.990 | <0.001 | 0.941-1.000 | 1.000 | 0.975 | 0.000000026 |
